# Supplementary material for: Upregulation of PD-1 Expression and High sPD-L1 Levels Associated with COVID-19 Severity
Source: PubMed Central journal article supplement (PMC9375698; doi:10.1155/2022/9764002), 2022-08-01

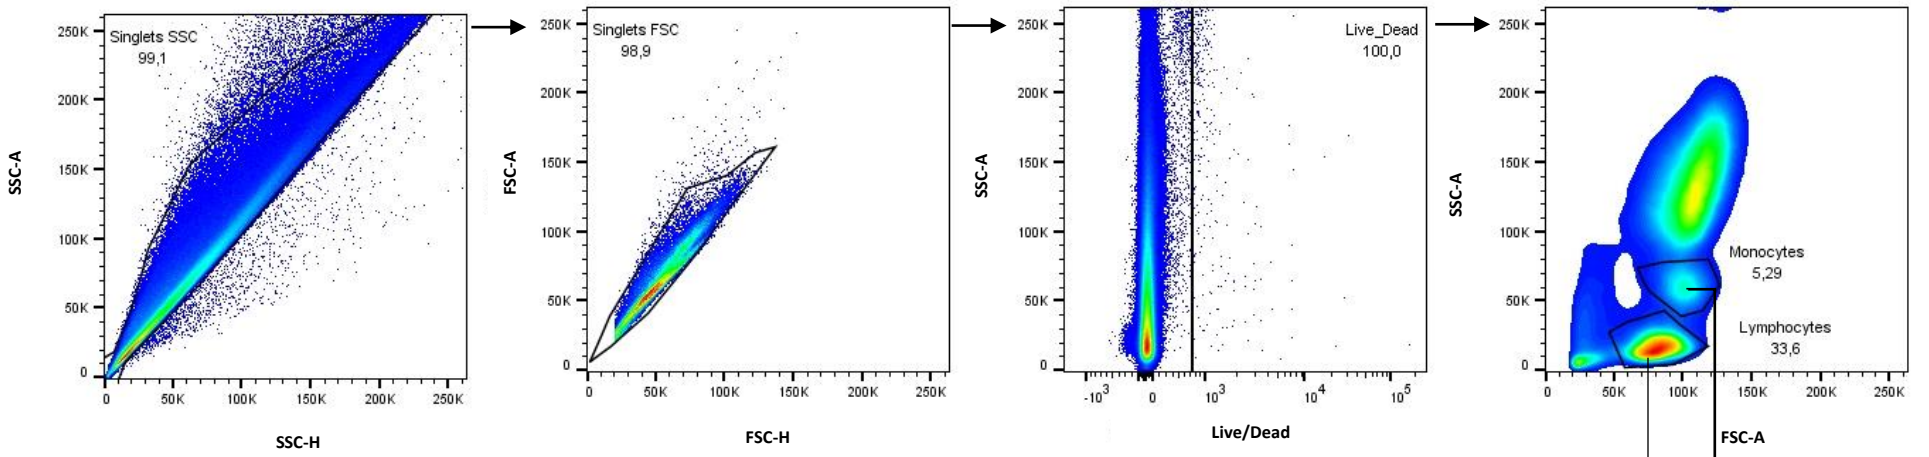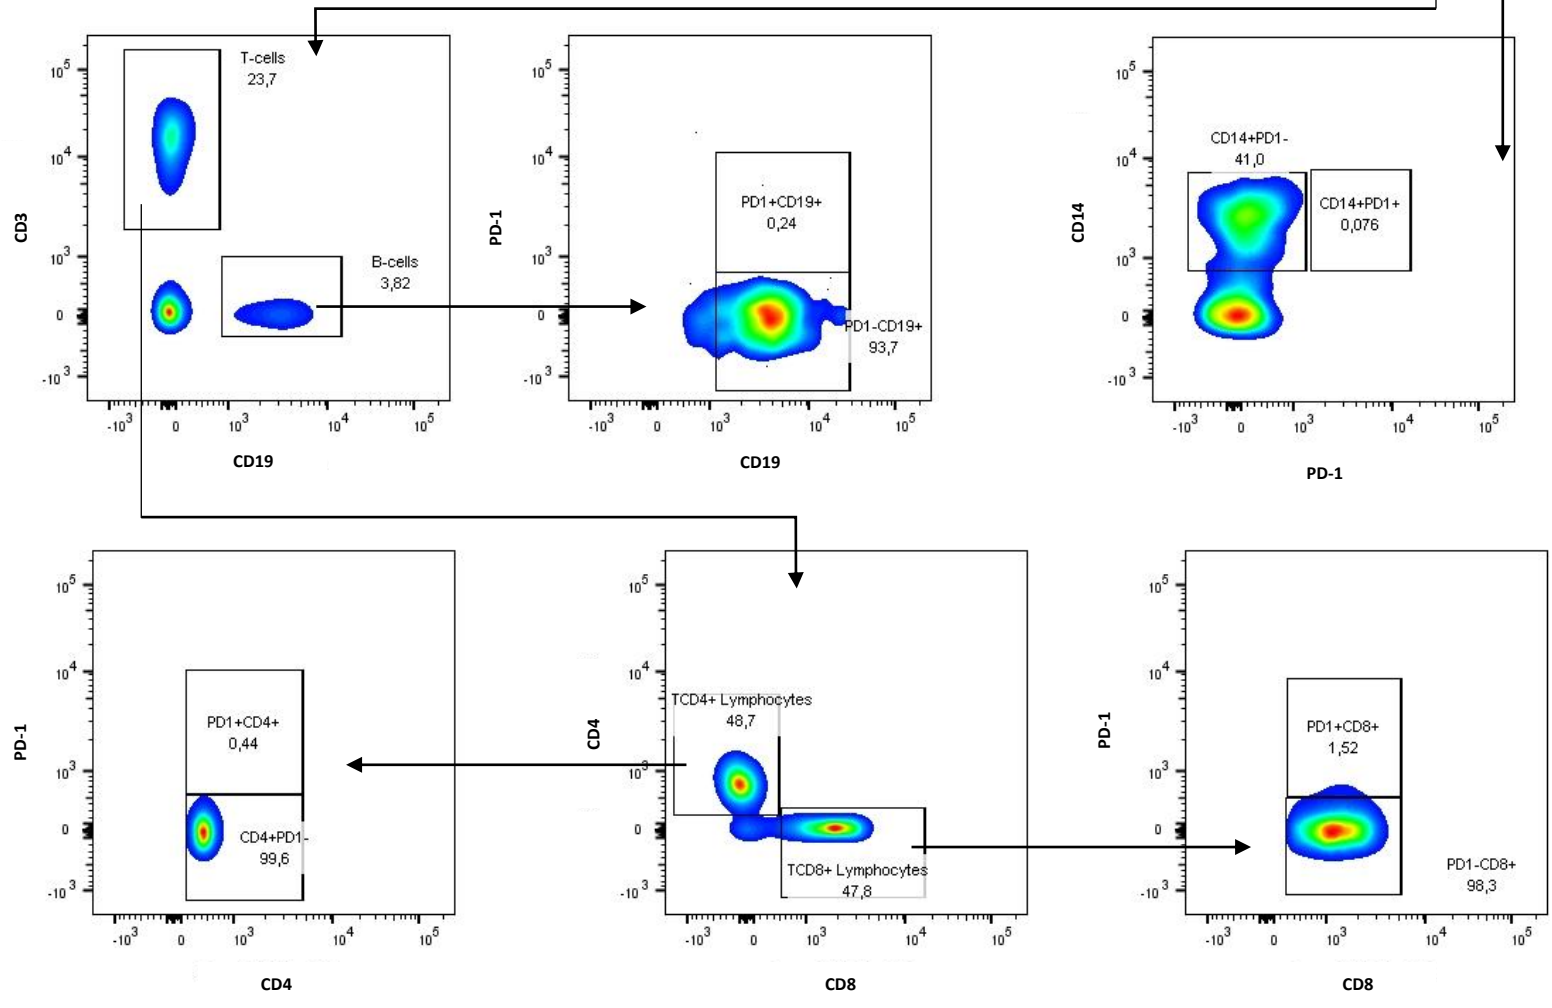

Supplement: 9764002.f1.pdf [file 9764002.f1.pdf]
